# Supplementary material for: Iron catalysed direct alkylation of amines with alcohols
Source: Springer Nature journal article supplement (doi:10.1038/ncomms6602), 2014-11-26
Supplement: 41467_2014_BFncomms6602_MOESM1_ESM.mol [file 41467_2014_BFncomms6602_MOESM1_ESM.mol]

  ChemDraw11061411222D

 16 16  0  0  0  0  0  0  0  0999 V2000
   -1.7862   -1.4438    0.0000 C   0  0  0  0  0  0  0  0  0  0  0  0
   -1.7862   -2.2688    0.0000 C   0  0  0  0  0  0  0  0  0  0  0  0
   -1.0717   -2.6812    0.0000 C   0  0  0  0  0  0  0  0  0  0  0  0
   -0.3572   -2.2688    0.0000 C   0  0  0  0  0  0  0  0  0  0  0  0
   -0.3572   -1.4438    0.0000 C   0  0  0  0  0  0  0  0  0  0  0  0
   -1.0717   -1.0313    0.0000 C   0  0  0  0  0  0  0  0  0  0  0  0
   -1.0717   -0.2062    0.0000 N   0  0  0  0  0  0  0  0  0  0  0  0
   -0.3572    0.2062    0.0000 C   0  0  0  0  0  0  0  0  0  0  0  0
   -0.3572    1.0313    0.0000 C   0  0  0  0  0  0  0  0  0  0  0  0
    0.3572    1.4437    0.0000 C   0  0  0  0  0  0  0  0  0  0  0  0
    0.3572    2.2687    0.0000 C   0  0  0  0  0  0  0  0  0  0  0  0
    1.0717    2.6813    0.0000 C   0  0  0  0  0  0  0  0  0  0  0  0
    1.0717    3.5062    0.0000 C   0  0  0  0  0  0  0  0  0  0  0  0
    1.7862    3.9188    0.0000 O   0  0  0  0  0  0  0  0  0  0  0  0
   -1.0717   -3.5063    0.0000 O   0  0  0  0  0  0  0  0  0  0  0  0
   -1.7862   -3.9188    0.0000 C   0  0  0  0  0  0  0  0  0  0  0  0
  1  2  2  0      
  2  3  1  0      
  3  4  2  0      
  4  5  1  0      
  5  6  2  0      
  6  1  1  0      
  6  7  1  0      
  3 15  1  0      
  7  8  1  0      
  8  9  1  0      
  9 10  1  0      
 10 11  1  0      
 11 12  1  0      
 12 13  1  0      
 13 14  1  0      
 15 16  1  0      
M  END
